# Supplementary material
Source: PubMed Central journal article supplement (PMC8900353)

**Supplementary Table 1 | Cognitive phenotype investigations in epilepsy**

| <b>Investigation</b>                | <b>Dependent variable(s)</b>                  | <b>Participants</b> | <b>Cluster method*</b> | <b>Cognitive phenotypes</b>     | <b>Imaging metrics included?</b>                                             | <b>Phenotype predictors+‡</b>                                                                                               | <b>Phenotype predictors-‡</b>                                          |
|-------------------------------------|-----------------------------------------------|---------------------|------------------------|---------------------------------|------------------------------------------------------------------------------|-----------------------------------------------------------------------------------------------------------------------------|------------------------------------------------------------------------|
| Paradiso et al. (1994) <sup>1</sup> | 3 academic measures (read, spell, arithmetic) | 117 TLE             | Empirical              | 6 academic achievement clusters | No                                                                           | Gender, specific cognitive tests                                                                                            | Age, age at onset, laterality                                          |
| Hermann et al. (2007) <sup>2§</sup> | 7 cognitive domains                           | 96 TLE, 82 HC       | Empirical              | 3 cognitive clusters            | Yes: cerebral, lobar, and hippocampal volumes (grey, white, CSF)             | Older age, longer epilepsy duration, no. of medications, neuroimaging metrics                                               | Gender, onset age, education, seizure frequency, laterality, aetiology |
| Dabbs et al. (2009) <sup>3§</sup>   | 7 cognitive domains                           | 55 TLE, 53 HC       | Empirical              | 3                               | Yes: cortical thickness; corpus callosum, subcortical and cerebellar volumes | Distributed regional cortical thickness and volumes of hippocampus, thalamus, basal ganglia, cerebellum and corpus callosum | NA                                                                     |
| Berl et al. (2014) <sup>4</sup>     | fMRI language activation                      | 220 FE, 118 HC      | Empirical              | 2, 4, and 9 cluster solutions   | Yes: fMRI language activation patterns                                       | Atypical handedness, early age of onset, abnormal MRI (especially vascular)                                                 | Age, gender, IQ, laterality or lobe of onset                           |
| Hermann et al. (2016) <sup>5</sup>  | 5 cognitive domains                           | 138 CWE, 95 HC      | Empirical              | 3 cognitive clusters            | Yes: cortical thickness and subcortical and cerebellar volumes               | Provision of early developmental services, parental IQ, neuroimaging metrics (cerebellum and subcortical structures)        | Gender, parental education, epilepsy syndrome, onset age birth weight  |

|                                               |                                                |                 |           |                                            |                                                                                         |                                                                                                                            |                                                                                                                                          |
|-----------------------------------------------|------------------------------------------------|-----------------|-----------|--------------------------------------------|-----------------------------------------------------------------------------------------|----------------------------------------------------------------------------------------------------------------------------|------------------------------------------------------------------------------------------------------------------------------------------|
| Rodriguez-Cruces et al. (2018) <sup>6ll</sup> | 10 indices from memory and intelligence tests  | 26 TLE, 24 HC   | Empirical | 3 cognitive clusters                       | Yes: diffusion MRI                                                                      | Hippocampal volume, integrity of white matter tracts, education, age of onset                                              | Laterality of TLE, number of meds, seizure frequency                                                                                     |
| Elverman et al. (2019) <sup>7</sup>           | 7 cognitive domains                            | 185 TLE         | Empirical | 4 cognitive clusters                       | No                                                                                      | Lateralization, seizure frequency, age of recurrent seizure onset, Wada language lateralization                            | Age at onset, epilepsy duration, no. of medications, sex, race, MTS, SE episodes; no. of seizure types, lifetime GTC                     |
| Reyes et al. (2019) <sup>8</sup>              | Language (n=3) and memory (n=3) tests          | 70 TLE, 46 HC   | Actuarial | 4 cognitive clusters                       | Yes: diffusion MRI (superficial white matter, fibre tract) and related network analyses | Age of onset, integrity of distributed white matter tracts and regional patterns of integrity and superficial white matter | Age, education, sex, handedness, epilepsy duration, no. of meds, MTS, seizure frequency, laterality                                      |
| Kaestner et al. (2019) <sup>9</sup>           | Language (n=3) tests, fMRI language activation | 85 TLE, 47 HC   | Actuarial | 2 language clusters (impaired/nonimpaired) | Yes: structure (cortical thickness), diffusion MRI, fMRI                                | fMRI language activation patterns, DTI tractography, WM fibre tracts                                                       | Age, education, gender, handedness, seizure frequency (partial and GTC), no. of ASMs, MTS, nonverbal IQ, laterality, language laterality |
| Reyes et al. (2020) <sup>10</sup>             | Language, verbal                               | 407 TLE, 151 HC | Empirical | 3 cognitive clusters                       | No                                                                                      | Education, onset, age, duration                                                                                            | Laterality                                                                                                                               |

|                                              |                                     |                |           |                               |                                                                                    |                                                                                                                                        |                                                                                |
|----------------------------------------------|-------------------------------------|----------------|-----------|-------------------------------|------------------------------------------------------------------------------------|----------------------------------------------------------------------------------------------------------------------------------------|--------------------------------------------------------------------------------|
|                                              | memory, executive, processing speed |                | Actuarial | 3 cognitive clusters          | No                                                                                 | Education, onset age, MTS                                                                                                              | Age, duration, sex, handedness, laterality                                     |
| Rodriguez-Cruces et al. (2020) <sup>11</sup> | 9 cognitive indices                 | 34 TLE, 25 HC  | Empirical | 3 cognitive clusters          | Yes: diffusion MRI, cortical thickness, hippocampal volume                         | Specific features of network graphs (degree centrality, path length, cluster coefficient), MTS, education                              | Gender, age, age of onset, duration, ASM number                                |
| Modi et al. (2019) <sup>12</sup>             | 8 executive function scales (BRIEF) | 237 CWE        | Empirical | 4 executive function clusters | No                                                                                 | Associations with patient and parental reported HRQoL scales as well as emotional and behavioral function scales                       | Recent seizures (prior 3 months), epilepsy syndrome, aetiology, chronicity     |
| Hermann et al. (2020) <sup>13</sup>          | 6 cognitive domains                 | 111 TLE, 82 HC | Empirical | 3 cognitive clusters          | Yes: cortical thickness and volume and subcortical and cerebellar volumes, rs-fMRI | Patient and parental education, racial diversity, lifetime SGS, age of medication onset, MTS, cerebellar atrophy, rs-fMRI connectivity | Gender, laterality, duration, no. of medications, cortical thickness or volume |
| Baxendale & Thompson (2020) <sup>14</sup>    | 4 cognitive domains                 | 242 TLE        | Actuarial | 4 cognitive clusters          | No                                                                                 | Age, age at onset, depression, anxiety, postoperative visual memory                                                                    | Laterality of TLE, sex, pathology, postoperative verbal memory                 |
| Struck et al. (2021) <sup>15</sup>           | 16 cognitive tests                  | 111 TLE, 55 HC | Empirical | 3 cognitive clusters          | Yes                                                                                | Graph theory metrics of global clustering coefficient and rich club proportion                                                         | Right and left temporal lobe connectivity ratios for degree and closeness      |
| Arrotta et al. (2021) <sup>16</sup>          | 5 cognitive domains                 | 106 FLE        | Actuarial | 4 cognitive clusters          | Yes                                                                                | Age, education, age of onset                                                                                                           | Sex, handedness,                                                               |

|                                   |                      |                                       |           |                                  |    |                                                              |                                     |
|-----------------------------------|----------------------|---------------------------------------|-----------|----------------------------------|----|--------------------------------------------------------------|-------------------------------------|
|                                   |                      |                                       |           |                                  |    |                                                              | duration, laterality                |
| Puka & Smith (2021) <sup>17</sup> | 15 cognitive metrics | 93 youth with drug-resistant epilepsy | Empirical | 2 prospective cognitive clusters | No | Baseline cognitive status, age, no. of ASMs, seizure freedom | Treated or not treated with surgery |

\*Cluster method: determined by cluster analyses (empirical) or actuarial method.

#Phenotype predictors: variables associated with (+) or not associated with (–) cluster membership.

§||¶ Investigations indicated by identical symbols represent linked studies.

Abbreviations: ASM, antiseizure medications; BRIEF, Behavior Rating Inventory of Executive Function; CSF, cerebrospinal fluid; CWE, children with epilepsy; DTI, diffusion tensor imaging; FE, focal epilepsy; fMRI, functional MRI; GTC, generalized tonic–clonic seizures; HC, healthy controls; HRQoL, health-related quality of life; IQ, intelligence quotient; MTS, mesial temporal sclerosis; NA, not applicable; no., number, rs-fMRI, resting-state fMRI; SE, status epilepticus; SGS, secondarily generalized seizures; TLE, temporal lobe epilepsy; WM, white matter.

1. Paradiso, S., Hermann, B.P. & Somes, G. Patterns of academic competence in adults with epilepsy: a cluster analytic study. *Epilepsy Res* **19**, 253-61 (1994).
2. Hermann, B., Seidenberg, M., Lee, E.J., Chan, F. & Rutecki, P. Cognitive phenotypes in temporal lobe epilepsy. *J Int Neuropsychol Soc* **13**, 12-20 (2007).
3. Dabbs, K., Jones, J., Seidenberg, M. & Hermann, B. Neuroanatomical correlates of cognitive phenotypes in temporal lobe epilepsy. *Epilepsy Behav* **15**, 445-51 (2009).
4. Berl, M.M. et al. Characterization of atypical language activation patterns in focal epilepsy. *Ann Neurol* **75**, 33-42 (2014).
5. Hermann, B.P. et al. Cognitive phenotypes in childhood idiopathic epilepsies. *Epilepsy Behav* **61**, 269-274 (2016).
6. Rodríguez-Cruces, R. et al. Association of white matter diffusion characteristics and cognitive deficits in temporal lobe epilepsy. *Epilepsy Behav* **79**, 138-145 (2018).
7. Elverman, K.H. et al. Temporal lobe epilepsy is associated with distinct cognitive phenotypes. *Epilepsy Behav* **96**, 61-68 (2019).
8. Reyes, A. et al. Cognitive phenotypes in temporal lobe epilepsy are associated with distinct patterns of white matter network abnormalities. *Neurology* **92**, e1957-e1968 (2019).
9. Kaestner, E. et al. Identifying the neural basis of a language-impaired phenotype of temporal lobe epilepsy. *Epilepsia* **60**, 1627-1638 (2019).
10. Reyes, A. et al. Cognitive phenotypes in temporal lobe epilepsy utilizing data- and clinically driven approaches: moving toward a new taxonomy. *Epilepsia* **61**, 1211-1220 (2020).
11. Rodríguez-Cruces, R., Bernhardt, B.C. & Concha, L. Multidimensional associations between cognition and connectome organization in temporal lobe epilepsy. *Neuroimage* **213**, 116706 (2020).
12. Modi, A.C. et al. Executive functioning phenotypes in youth with epilepsy. *Epilepsy Behav* **90**, 112-118 (2019).
13. Hermann, B. et al. Network, clinical and sociodemographic features of cognitive phenotypes in temporal lobe epilepsy. *Neuroimage Clin* **27**, 102341 (2020).
14. Baxendale, S. & Thompson, P. The association of cognitive phenotypes with postoperative outcomes after epilepsy surgery in patients with temporal lobe epilepsy. *Epilepsy Behav* **112**, 107386 (2020).

15. Struck, A.F. et al. Regional and global resting-state functional MR connectivity in temporal lobe epilepsy: results from the Epilepsy Connectome Project. *Epilepsy Behav* **117**, 107841 (2021).
16. Arrotta, K. et al. Cognitive phenotypes in frontal lobe epilepsy. Presented at the 49th Annual Meeting of the International Neuropsychological Society, San Diego, CA, USA (2021).
17. Puka, K. & Smith, M. L. Long-term outcomes of children with drug-resistant epilepsy across multiple cognitive domains. *Dev Med Child Neurol* **3**, 690-696 (2021).

Supplementary Figure 1 | Pathways between epilepsy, genomics and neurobehavioural comorbidities

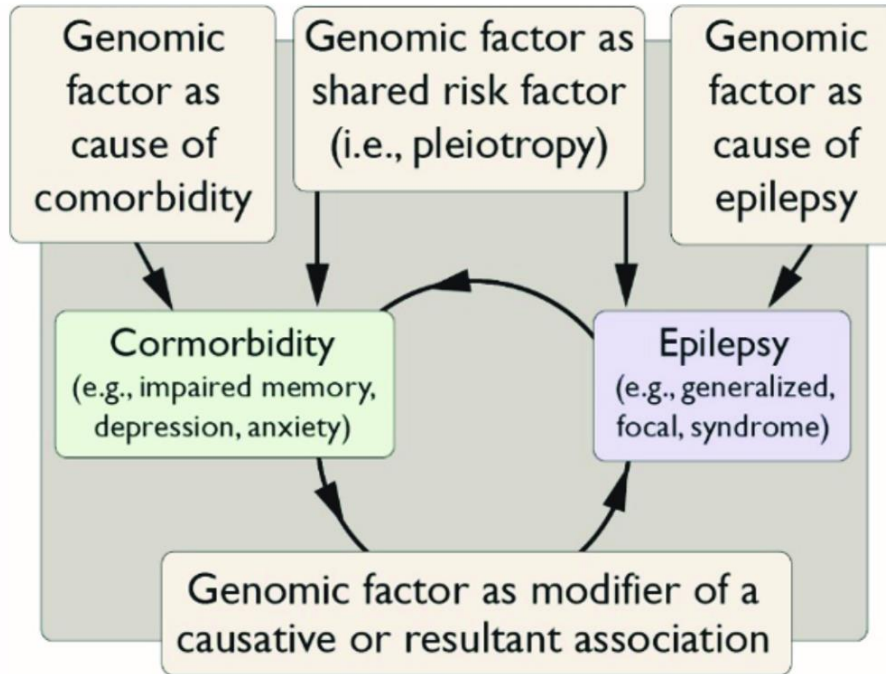

Supplement: NIHMS1765552-supplement-Supplementary_Table_1.pdf [file NIHMS1765552-supplement-Supplementary_Table_1.pdf]
